# 1 Leaf rolling in maize crops: from leaf scoring to 2 canopy level measurements for phenotyping.

---

3 <sup>1</sup>F. Baret, [baret@avignon.inra.fr](mailto:baret@avignon.inra.fr); +33 4 32722363 ORCID ID: [orcid.org/0000-0002-7655-8997](http://orcid.org/0000-0002-7655-8997)

4 <sup>1</sup>S. Madec, [simon.madec@inra.fr](mailto:simon.madec@inra.fr)

5 <sup>1</sup>K. Irfan, [kamranali@hotmail.fr](mailto:kamranali@hotmail.fr)

6 <sup>3</sup>J. Lopez, [jeremy.lopez@biogemma.com](mailto:jeremy.lopez@biogemma.com)

7 <sup>2</sup>A. Comar, [acomar@hiphen-plant.com](mailto:acomar@hiphen-plant.com)

8 <sup>2</sup>M. Hemmerlé, [Mhemmerle@Hiphen-Plant.Com](mailto:Mhemmerle@Hiphen-Plant.Com)

9 <sup>2</sup>D. Dutartre, [Dcohen@Hiphen-Plant.Com](mailto:Dcohen@Hiphen-Plant.Com)

10 S. Praud, [sebastien.praud@biogemma.com](mailto:sebastien.praud@biogemma.com)

11 <sup>3</sup>M. H. Tixier, [marie-helene.tixier@biogemma.com](mailto:marie-helene.tixier@biogemma.com)

12

13 <sup>1</sup>INRA-EMMAH-CAPTE, Avignon, France

14 <sup>2</sup>Biogemma, Chappes, France

15 <sup>3</sup>HIPHEN, Avignon, France

16

17 Number of figures: 14

18 Number of tables: 2

19 Number of words: 4939

20

21 **Title:** Leaf rolling in maize crops: from leaf scoring to canopy level measurements for phenotyping.

22 **Running Title:** leaf rolling in maize crop

23 **Highligh:** The diurnal dynamics of leaf rolling scored visually is strongly related to canopy structure  
24 changes that can be documented using Digital hemispherical photography. Consequences for high-  
25 throughput field phenotyping are discussed.

26 **Abstract**

27 Leaf rolling in maize crops is one of the main plant reactions to water stress that may be visually scored  
28 in the field. However, the leaf scoring did not reach the high-throughput desired by breeders for efficient  
29 phenotyping. This study investigates the relationship between leaf rolling score and the induced canopy  
30 structure changes that may be accessed by high-throughput remote sensing techniques.

31 Results gathered over a field phenotyping platform run in 2015 and 2016 show that leaf starts to roll for  
32 the water stressed conditions around 9:00 and reaches its maximum around 15:00. Conversely,  
33 genotypes conducted under well watered conditions do not show any significant rolling during the same  
34 day. Leaf level rolling was very strongly correlated to canopy structure changes as described by the  
35 fraction of intercepted radiation  $fIPAR_{WS}$  derived from digital hemispherical photography. The changes  
36 in  $fIPAR_{WS}$  were strongly correlated ( $R^2 = 0.86, n = 50$ ) to the leaf level rolling visual score. Further, a  
37 very good consistency of the genotype ranking of the  $fIPAR_{WS}$  changes during the day was found  
38 ( $\rho=0.62$ ). This study demonstrating the strong coordination between leaf level rolling and its impact on  
39 canopy structure changes poses the basis for new high-throughput remote sensing methods to quantify  
40 this water stress trait.

41  
42 **Keywords:** maize, water stress, leaf rolling, canopy structure, digital hemispherical photographs, FIPAR  
43 diurnal course

44

## 45 List of figures

- 46 Figure 1. diurnal variation of global radiation ( $R_g$ ), temperature ( $T$ ) and VPD observed the 5<sup>th</sup> of August  
47 2015 and the 3<sup>rd</sup> of August 2016 in Nérac experiment. .... 20
- 48 Figure 2 : Location of DHP measurements over the 2 rows of a microplot. .... 21
- 49 Figure 3 : DHP images taken at seven different time (S1: morning, S7: late afternoon) at the same  
50 location of a microplot. Images show artifacts for S4 and S5 due to direct sun light. It shows  
51 clearly the changes of canopy structure from the morning to afternoon due to leaf rolling. .... 22
- 52 Figure 4 : Diurnal pattern of leaf rolling scores for Water stress modality. In 2015 (left) 30 genotypes; in  
53 2016 (right) 16 genotypes. Box plot representation where the red line is the median, the edges  
54 of the box are the 25th and 75th percentiles, the whiskers extend to the most extreme data  
55 points the algorithm considers to be not outliers, and the outliers are plotted individually as red  
56 '+' ..... 23
- 57 Figure 5 : Diurnal evolution of the gap fraction values measured for 9 solid angles indicated by the  
58 numbers on the left: the first number if the zenith, the second one is the azimuth. Each curve is  
59 the average of the 30 genotypes for 2015, 16 water-stressed genotypes for 2016, and 4  
60 irrigated genotypes for 2016. .... 24
- 61 Figure 6. Distribution of the *fIPARWS* values observed in the early morning (unrolled state) for all the  
62 50 genotypes investigated. The values are sorted in ascending order. The colors correspond to  
63 the years and modalities. The genotypes common between years and modalities are indicated  
64 above each bar. .... 25
- 65 Figure 7. On the left panel, relationship between the unrolled state *fIPARWS* observed in the early  
66 morning (*FIPARWS* unrolled) and the *fIPARWS* values corresponding to the state with  
67 maximum leaf rolling observed in the late afternoon (*FIPAR<sub>WS</sub>* rolled). On the right panel,  
68 relationship between the unrolled state *fIPARWS* (*FIPAR<sub>WS</sub>* unrolled) and the difference  
69 between *fIPARWS* values observed between early morning and late afternoon ( $\Delta$ *FIPAR<sub>WS</sub>*).  
70 Data corresponding to the water stress modality (WS, 46 points) in 2015 (green) and  
71 2016 (red). The solid line represents the linear best fit. .... 26
- 72 Figure 8. On the left, relationship between  $\Delta$ *fIPARWS* and the leaf rolling visual score (Score-1). The  
73 solid lines correspond to the best fit line verifying the constraint  $\Delta$ *fIPARWS* = 0 when  
74 *Score* = 1 (Equation 3) for the 2015 (green) and 2016 (red) WS modalities. The black dash line  
75 corresponds to the best fit over the 370 available points (including the WW modality in 2016).  
76 On the right, relationship between *CLIR* and the leaf rolling visual score (Score-1). The solid  
77 black line corresponds to Equation 5. .... 27
- 78 Figure 9. On the left, distribution of the maximum value of the leaf rolling visual score (Max(Score-1))  
79 observed over each microplot during the day. On the right, distribution of the maximum value  
80 of *CLIR* observed over each microplot during the day. The values are sorted in ascending  
81 order. The colors correspond to the years and modalities for the 50 microplots. The genotypes  
82 common between years and modalities are indicated above each bar. .... 28
- 83 Figure 10. On the left, comparison between the maximum value of the normalized score (Score-1)  
84 observed in 2015 (x axis) and 2016 (y axis). On the right, comparison between the maximum  
85 value of *CLIR* observed in 2015 (x axis) and 2016 (y axis). The numbers correspond to the  
86 genotype identifier. The solid line is the 1:1 line. The Pearson ( $R^2$ ) and Spearman ( $\rho^2$ )  
87 coefficients are provided. .... 29
- 88 Figure 11. Diurnal dynamics of the leaf rolling visual scores evaluated at the leaf level (black line), and the  
89 score estimated from equation 5 (red line) from canopy level DHP measurements. Top, the 2  
90 center and bottom plots correspond respectively to 2016 WW (4 genotypes), 2016 WS (8

|     |                                                                                                                 |    |
|-----|-----------------------------------------------------------------------------------------------------------------|----|
| 91  | genotypes) and 2015 WS (the same 8 genotypes). Genotype identifier is given in each subplot.                    |    |
| 92  | .....                                                                                                           | 30 |
| 93  | Figure 12. dynamics of the rolling evaluated at the leaf level (○), and the canopy level (□) using              |    |
| 94  | Equation in the 9:00 to 13:00 time interval. The solid line corresponds to the best linear robust               |    |
| 95  | fit. The 2 top and bottom plots correspond respectively to 2016 WS (8 genotypes) and 2015 WS                    |    |
| 96  | (the same 8 genotypes). Genotype identifier is given in each subplot. ....                                      | 31 |
| 97  | Figure 13. Distribution of the time ( $t_{max}/2$ in hour) when half the maximum rolling is observed (left)     |    |
| 98  | and the slope corresponding to the rate of change of the rolling from minimum to maximum ( $\alpha$             |    |
| 99  | in $\text{hour}^{-1}$ ). The colors correspond to the years and modalities for the 46 microplots (the WW        |    |
| 100 | 2016 plots are obviously not represented here). The genotypes common between years and                          |    |
| 101 | modalities are indicated above each bar.....                                                                    | 32 |
| 102 | Figure 14. Distribution of the slope values for the 8 common genotypes in 2015 or 2016 and for all the          |    |
| 103 | genotypes considered in 2015 (30) and 2016 (16) for the WS modality. Three slopes are                           |    |
| 104 | displayed: on the left the slope $\alpha$ computed on the normalized Scores and CLIR data; in the               |    |
| 105 | center, the slopes in absolute values of Scores ( $\alpha \text{maxScore} - \text{min(Score)}$ ); on the right, |    |
| 106 | the slopes in absolute values of CLIR ( $\alpha \text{maxCLIR} - \text{minCLIR}$ ).....                         | 33 |
| 107 |                                                                                                                 |    |

108

## 109 List of Tables

|     |                                                                                                           |    |
|-----|-----------------------------------------------------------------------------------------------------------|----|
| 110 | Table 1. Distribution of the 38 genotypes used in 2015 and 2016 for the WS and WD modalities.             |    |
| 111 | .....                                                                                                     | 34 |
| 112 | Table 2. Characteristics of the models (Equation 3 or Equation 4) used to relate the leaf rolling         |    |
| 113 | visual score to the canopy $fIPARWS$ level values. RMSE is expressed in Score units. (1) It includes also |    |
| 114 | the 2016 WW plots.....                                                                                    | 35 |
| 115 |                                                                                                           |    |
| 116 |                                                                                                           |    |

## 117 **1 Introduction**

118 Drought is recognized as one of the main factors limiting the production of maize crops (Farhangfar et  
119 al., 2015). Plants have developed several mechanisms to mitigate the impact of environmental stresses  
120 including “leaf rolling”. Under severe stress conditions, leaf lamina rolls transversally to the mid rib. This  
121 mechanism results from a differential top-bottom elastic shrinkage in the leaf cross section (Moulia,  
122 2000). Leaf rolling has thus been related to the water potential in the leaf (Kadioglu *et al.*, 2012) and was  
123 called for this reason hydronastic (Moulia, 2000). For maize, leaf rolling is observed from leaf water  
124 potentials of -1MPa and reaches its maximum around -2MPa (Moulia, 1994). Leaf rolling reaches its  
125 maximum close to solar noon during bright sunny days (Kadioglu and Terzi, 2007) and the top leaves are  
126 generally more affected (Tatar *et al.*, 2010). This occurs when the evaporative demand is no more  
127 balanced by soil water extraction by the root system.

128 The leaf water potential is mostly controlled by the osmotic component through a range of biochemical  
129 pathways. Leaf rolling has been related to the accumulation of phyto-hormones (Krishna, 2003;  
130 Takahashi and Kakehi, 2010; Talaat and Shawky, 2012). Some of these hormones control stress  
131 responsive gene expression (Divi *et al.*, 2010). Some prominent changes in concentration of organic acids  
132 or ions such as  $K^+$  and  $Cl^-$  may also induce leaf rolling as demonstrated by (Saglam *et al.*, 2010). In  
133 addition to the biotic factors described earlier, (Kadioglu *et al.*, 2012) demonstrated that herbivores,  
134 viruses, bacteria and fungi may also induce leaf rolling through other biochemical pathways.

135 When the leaf is considered as a thin shell that verifies the law of mechanics, the transversal leaf rolling  
136 is coupled with longitudinal changes in the leaf curvature. (Hay et al., 2000; Moulia, 2000). This makes  
137 the leaf stiffer and more erect because the leaf insertion angle is generally closer to the vertical than the  
138 average leaf angle inclination. As a consequence, leaf rolling reduces the leaf surface exposed to sun  
139 light. This potentially decreases both transpiration and photosynthesis at the canopy level (Abd Allah,  
140 2009). However stomata are generally closed under such stress conditions prevailing during leaf rolling,  
141 limiting the exchanges of  $CO_2$  and water between the leaf and the atmosphere. Nevertheless, the  
142 boundary layer resistance of the rolled leaves is increased, limiting the leaf transpiration rate (O'Toole et  
143 al., 1979). Another consequence of leaf rolling is to re-orient the normal of leaf surfaces generally away  
144 from the sun direction (Smith, 1997). This reduces the density of photon flux per unit leaf area (Duncan,  
145 1971), limiting leaf overheating and the associated damages of the photosynthetic apparatus (Nar et al.,  
146 2009; Sarieva et al., 2010). Leaf re-orientation affects also the fraction of adaxial or abaxial faces exposed  
147 to the incoming light that have distinctive behaviors (Driscoll et al., 2006; Soares et al., 2008) with

148 consequences on photosynthetic capacity and possible damages on the photosynthetic machinery. Leaf  
149 rolling contributes thus to maintain the internal plant water status (Subashri, 2009). On a longer time  
150 scale, leaf rolling may be also associated to a decrease in chlorophyll content due to the reduction of leaf  
151 area exposed to the sun as proposed by (Subashri, 2009) although this could also mainly result from a  
152 direct effect of drought on chlorophyll content as reported by (Bolanos and Edmeades, 1996).

153 Leaf rolling as a consequence of water stress results from a combination of factors including the root  
154 development, the root water extraction efficiency, the adjustment of leaf area index, the canopy  
155 structure differences under non-stressed conditions, the leaf transpiration rate and the sensitivity of the  
156 roll up mechanism to leaf water potential. Although leaf rolling observed at the canopy scale appears to  
157 be a complex trait, it bears key information on the strategy followed by the plants in case of stress  
158 conditions and should be of high value for plant breeders to evaluate genotypes. The genetic diversity in  
159 maize shows a large range of drought tolerance that is exploited by plant breeders (Adebayo and Menkir,  
160 2014). Among several traits, leaf rolling is thus a potential trait that may be used by breeders to evaluate  
161 drought resistance. It was already associated to QTLs in rice (Price *et al.*, 2002) and durum wheat (Peleg  
162 *et al.*, 2009).

163 Several methods have been proposed to quantify leaf rolling. (Sirault *et al.*, 2015) evaluated the capacity  
164 of leaves to roll up under controlled conditions: leaf strips were immersed in a polyethylene glycol  
165 solution at a range of concentration. After equilibrium was reached, the leaf cross-section was imaged  
166 using micro-photographs. The convex hull of the cross section was finally exploited to quantify the leaf  
167 rolling. Several methods have been also developed to evaluate the actual level of leaf rolling under  
168 natural conditions. (O'Toole *et al.*, 1979) proposed to use a template of schematic transversal leaf  
169 sections (from flat to completely rolled position). This method was applied by (Clarke, 1986) to relate  
170 leaf rolling to leaf water concentration. A similar scoring method based on the ratio of rolled leaf width  
171 to unrolled leaf width (Premachandra *et al.*, 1993) was used to relate leaf rolling to drought tolerance  
172 (Saruhan *et al.*, 2012; Saglam *et al.*, 2014).

173 All the methods of leaf rolling evaluation formerly listed are relatively low-throughput. They are difficult  
174 to be applied over large phenotyping experiments because of the highly dynamic nature of leaf rolling.  
175 High-throughput leaf rolling methods are thus highly desired for field experiments. This may be  
176 completed by imaging the diurnal changes in canopy structure related to leaf rolling using high-  
177 throughput techniques based on UAV observations (Sankaran *et al.*, 2015). The objective of this study is  
178 to quantify the effect of leaf rolling on canopy structure using Digital Hemispherical Photograph (DHP).

179 DHP provides a very efficient way to describe several canopy structure variables from the directional gap  
180 fraction  $Po(\theta)$  (Jonckheere *et al.*, 2004; Weiss *et al.*, 2004b; Lopez-Lozano *et al.*, 2007). A total of 50  
181 maize genotypes with contrasting leaf rolling behavior was studied during two consecutive years. The  
182 diurnal variation of canopy structure of each genotype was documented using DHP measurements  
183 completed several times during the day under severe water stress conditions. The consistency of DHP  
184 measurements with visual scoring of leaf rolling was investigated. A method is then proposed to quantify  
185 the leaf rolling from the DHP. Results are finally discussed on the possible use of UAV observations for  
186 high-throughput leaf rolling characterization.

## 187 **2 Materials and methods**

### 188 **2.1 The experiment**

189 Two experiments were conducted near Nérac, France (44.17° N, 0.30° E) in 2015 and 2016. The rows  
190 were oriented NW-SW. A total of 800 genotypes of maize were grown in plots made of 2 adjacent rows  
191 with 0.8m spacing by 6 m long (Figure 2). A subsample of 38 genotypes were selected for their large  
192 differences in canopy structure and susceptibility to leaf rolling. In 2015, 30 genotypes were maintained  
193 under severe water stress conditions (WS modality). In 2016 16 genotypes were maintained similarly  
194 under severe water stress conditions (WS modality) while 4 of them were also conducted under well  
195 irrigated conditions (WW modality). Height genotypes were present on both years in the WS modality  
196 while only 2 of them were also sampled in WD modality in 2016 (Table 1). The soil moisture at the field  
197 capacity is 200 mm, with hardly available water (HAW) below 60 mm. In 2015, the soil moisture was  
198 below HAW since the 5<sup>th</sup> of July for the WS modality, with 25 mm remaining water the 5<sup>th</sup> of August at  
199 the date of the leaf rolling measurements. In 2016, the soil moisture was below HAW since the 8<sup>th</sup> of  
200 July, with 35 mm remaining water the 3<sup>rd</sup> of August at the date of the leaf rolling measurements.  
201 Regarding the soil conditions, the water stress was therefore slightly stronger in 2015 as compared to  
202 2016. The leaf rolling measurements were performed roughly at the female flowering stage known to be  
203 very sensitive to water stress. For both years, measurements were completed under very hot and sunny  
204 days with almost the same illumination conditions (Figure 1). However, the 5<sup>th</sup> of August 2015 was more  
205 stressful as compared to the 3<sup>rd</sup> of August 2016, with higher temperatures and much larger vapor  
206 pressure deficit (VPD) as calculated from air temperature and humidity after (Monteith and Unsworth,  
207 2007).

## 208 **2.2 Visual scoring of leaf rolling**

209 The leaf rolling was scored by some visual notations from 1 to 9: score 1 corresponds to no leaf rolling  
210 (the cross section of the leaf is almost flat) which observed during early morning or under no water  
211 stress conditions; score of 9 corresponds to the maximum leaf rolling, i.e. when the leaf cross section is  
212 fully rolled. The same operator was scoring the microplots for the two experiments, to limit possible  
213 biases during the day and years. The scoring was repeated approximately every hour from 9:00 to 17:00.  
214 It results in a total of 430 notations. About 15 minutes were necessary to score 30 plots.

## 215 **2.3 DHP measurements**

216 Upward looking digital hemispherical photographs were taken with a sigma SD-14 equipped with fisheye  
217 lens of 8 mm focal length. The camera was set on automatic exposure. The images are recorded in jpg  
218 with 2640 x 1760 pixels. The optical center and projection function of the camera were calibrated using  
219 the method described in ([http://www.avignon.inra.fr/can\\_eye](http://www.avignon.inra.fr/can_eye)). Images were repeated approximately  
220 every 1.5 hour during the day from 9:00 to 17:00 resulting in 7 series of 30 (in 2015) or 20 (in 2016)  
221 images. About 30 minutes were necessary to sample 30 plots.

222 A total of 10 photos were taken on each microplot at each time step in the day to capture the spatial  
223 variability (Weiss *et al.*, 2004a). Photos were distributed over two diagonal segments placed between the  
224 two center rows (Figure 2). A 2m long stick with marked positions was used to indicate the precise  
225 location of the camera for taking each image over a segment. The position of the stick over each  
226 microplot was kept the same across the repeated measurements during the day to provide a high degree  
227 of temporal consistency. The camera was looking upward and always oriented the same with regards to  
228 the row direction. Sampling a microplot with 10 images takes about 1 minute. Note that the  
229 hemispherical images account partly for the neighboring microplots. However, this influence is limited  
230 since images are exploited for zenith angles smaller than 60°.

## 231 **2.4 Processing the DHP**

232 The 3500 images (50 microplots with 10 images per microplot sampled 7 times during the day) were  
233 processed using the CAN-EYE freeware ([www.avignon.inra.fr/can\\_eye](http://www.avignon.inra.fr/can_eye)). CAN-EYE is a package of Matlab  
234 functions developed to estimate canopy structure characteristics from RGB images (Demarez *et al.*,  
235 2008). Direct exposure of sun over the camera during afternoon measurement induces local artifacts  
236 (see S4 and S7 in Figure 3) that were easy to correct using the versatile color segmentation in CAN-EYE.



237 The main output of can-eye is the bidirectional gap fraction  $P_o(\theta, \varphi)$  where  $0^\circ < \theta < 62.5^\circ$  and  
238  $0^\circ < \varphi < 360^\circ$ .  $\theta = 0^\circ$  corresponds to the nadir direction and  $\varphi = 0^\circ$  corresponds to the row direction. The  
239 zenith and azimuth directions are integrated into  $2.5^\circ$  steps. Zenith angles higher than  $62.6^\circ$  were  
240 discarded due to the large fraction of mixed pixel and the larger contribution of the neighboring plots.  
241 Due to the assumed symmetry along the row direction and across the row directions, the directional gap  
242 fraction values were averaged to provide a representative quadrant,  $\overline{P_o(\theta, \varphi_q)}$  with  $0^\circ < \varphi_q < \frac{\pi}{2}$ :

$$243 \quad \overline{P_o(\theta, \varphi_q)} = \frac{1}{4} \left( P_o(\theta, \varphi_q) + P_o(\theta, 2\pi - \varphi_q) + P_o(\theta, 2\pi + \varphi_q) + P_o(\theta, 4\pi - \varphi_q) \right) \quad \text{Equation 1}$$

244 Several “segmental gap fraction” were computed to investigate the possible correlation with the leaf  
245 rolling score. They correspond to integration over larger solid angles to provide more stable directional  
246 gap fraction values: the hemisphere was divided into three different rings of  $20^\circ$  zenithal sectors:  $[0^\circ < \theta$   
247  $< 20^\circ]$ ,  $[20^\circ < \theta < 40^\circ]$ ,  $[40^\circ < \theta < 60^\circ]$ . Further, each ring was divided into three azimuthal ranges:  $[0^\circ < \varphi_q$   
248  $< 30^\circ]$ , corresponding to the row direction,  $[30^\circ < \varphi_q < 60^\circ]$  corresponding to a direction diagonal to the  
249 row direction, and  $[60^\circ < \varphi_q < 90^\circ]$  corresponding to the direction perpendicular to the row. Therefore, a  
250 total of 9 integrated gap fractions were computed. In addition, the fraction of diffuse radiation  
251 intercepted by the canopy, called white sky fIPAR ( $fIPAR^{WS}$ ), was also computed:

$$252 \quad fIPAR_{WS} = \frac{\sum_0^{\pi/2} (1 - P_o(\theta)) \cos(\theta) \sin(\theta)}{\sum_0^{\pi/2} \cos(\theta) \sin(\theta)} \quad \text{Equation 2}$$

253 Where  $P_o(\theta)$  is the azimuthally averaged value of  $P_o(\theta, \varphi)$ . When evaluating  $fIPAR_{WS}$ , values of  $P_o(\theta)$   
254 for  $\theta > 62.5^\circ$  were computed assuming a linear interpolation of the term  $(1 - P_o(\theta)) \cos(\theta) \sin(\theta)$   
255 between  $\theta = 62.5^\circ$  when  $P_o(62.5^\circ)$  is measured, and  $\theta = \frac{\pi}{2}$  for which  $\left(1 - P_o\left(\frac{\pi}{2}\right)\right) \cos\left(\frac{\pi}{2}\right) \sin\left(\frac{\pi}{2}\right) =$   
256 0.0.

## 257 **3 Results and Discussion**

### 258 **3.1 Diurnal variation of the leaf rolling visual score**

259 In absence of water stress, leaves keep unrolled as observed in Figure 1 for the 4 genotypes grown under  
260 well irrigated conditions in 2016. Conversely, leaf rolling was observed for all the genotypes subjected to  
261 water stress both in 2015 and 2016. All the genotypes show very similar diurnal patterns of the leaf  
262 rolling score both in 2015 and 2016. The score starts from the minimum value,  $\text{Score} \approx 1$ , in the early

263 morning (7:30 UT) when no leaf rolling is observed (Figure 4). However, few cultivars show already some  
264 leaf rolling for the first scoring of the day. Then, leaves roll up progressively when the water stress  
265 experienced by the canopy increases as a function of the climatic demand controlled mainly by the  
266 incoming radiation, and the vapor pressure deficit: at 9:00 UT leaf rolling was already observed on many  
267 genotypes on both years, when  $VPD \approx 1.5$  kPa. Maximum leaf rolling was reached around 15:30 UT with  
268 some significant variation of the magnitude between genotypes. This corresponds to the maximum value  
269 of the VPD during the day (Figure 1). Finally, leaves start to unroll when the climatic demand decreases  
270 significantly. Variability at a given time between genotypes under water stress is maximum when the  
271 rate of increase of leaf rolling score is maximum, around 12:30 UT (Figure 4).

### 272 **3.2 Diurnal variation of the directional gap fraction**

273 Similarly to the visual score, no clear diurnal variation of the gap fraction is observed over the irrigated  
274 genotypes (Figure 5, red curves on the right). Conversely, the directional gap fraction increases during  
275 the day over the water stressed genotypes both in 2015 and 2016 (Figure 5, black curves). Very similar  
276 patterns to those of leaf rolling scores are observed, with a minimum value in the early morning, and a  
277 maximum value reached around 15:30 UT. This corresponds to the maximum daily temperature and VPD  
278 values (Figure 1). After this maximum value, leaves start to unroll at the end of the afternoon.

279 The same diurnal pattern is observed for all the directions considered, with mainly changes in minimum  
280 and maximum values (Figure 5). As expected, higher gap fraction values are observed close to nadir and  
281 in the directions parallel to the row. Conversely, the lowest gap fraction values are observed for  
282 directions perpendicular to the row and for the larger zenith angles. If the largest diurnal variation is  
283 observed for the near nadir directions, a very strong consistency is observed between the diurnal  
284 patterns of all the directions considered (Figure 5).

### 285 **3.3 Impact between leaf level rolling and canopy architecture changes**

286 The leaf level rolling as scored visually was tentatively related to the directional gap fractions measured  
287 with the DHPs that document the corresponding changes in canopy architecture. The fraction of  
288 intercepted radiation under diffuse illumination conditions ( $fIPAR_{WS}$ ) was proposed to be used as a  
289 proxy of the canopy structure. This is supported by the very strong consistency between the gap  
290 fractions observed in the different directions (Figure 5). The  $fIPAR_{WS}$  is computed from the directional  
291 integration of the gap fractions (Equation 2). The integration offers the advantage to smooth out

292 uncertainties associated to each directional gap fraction measurements, providing therefore more  
293 robust results.

294 The visual score corresponding to the unrolled state of the leaf observed in the early morning (before  
295 9:00 UT) were always set to Score≈1 for each genotype (Figure 4). However, at the canopy level,  
296  $fIPAR_{WS}$  values show significant variability between genotypes when leaf rolling has not yet started  
297 (Figure 6). These differences are explained by genotypic specificities in the canopy architecture due to  
298 differences in the leaf area index and/or in plant morphology. Note that the irrigated modality (WW) in  
299 2016 shows the higher  $fIPAR_{WS}$  values as compared to the water stress (WS) modalities since drought  
300 already impacted leaf expansion during the weeks preceding the measurements. Similarly, the 2016  
301 water stress was less severe as in 2015, with generally larger  $fIPAR_{WS}$  values in 2016, in agreement with  
302 the water balance presented previously. Closer inspection of the distribution of the 8 genotypes that are  
303 common between 2015 and 2016 experiments show that the values of the unrolled  $fIPAR_{WS}$  observed  
304 in 2015 are not correlated with those observed in 2016 ( $R^2=0.07$ ) with a very small spearman correlation  
305 coefficient ( $\rho^2=0.06$ ).

306 The differences in  $fIPAR_{WS}$  values in the early morning between genotypes and environmental  
307 conditions induced differences in the  $fIPAR_{WS}$  values observed during maximum leaf rolling as  
308 demonstrated by Figure 7, left panel ( $R^2=0.50$ ,  $n=46$ , correlation significant at  $\alpha=5\%$ ). However, no  
309 significant ( $\alpha=5\%$ ) correlation is observed between the difference  $\Delta fIPAR_{WS}^{max\_roll} = fIPAR_{WS}(t_0) -$   
310  $fIPAR_{WS}^{max\_roll}$  between the unrolled state in the early morning,  $fIPAR_{WS}(t_0)$ , and the minimum  
311  $fIPAR_{WS}$  value corresponding to maximum leaf rolling in the late afternoon,  $\Delta fIPAR_{WS}^{max\_roll}$  (Figure 7,  
312 right panel). A simple base line normalization is therefore proposed to limit the impact of the genotypic  
313 and environmental differences in the early morning: the  $fIPAR_{WS}(t)$  values observed during the day at  
314 time  $t$  are subtracted from the unrolled  $fIPAR_{WS}(t_0)$  values observed in the early morning,  $t_0$ :  
315 
$$\Delta fIPAR_{WS} = fIPAR_{WS}(t) - (t)$$

316 The visual scores and the corresponding  $fIPAR_{WS}(t)$  values need to be assigned to the same time  
317 during the day to establish a relationship between them. The visual scores that were more frequently  
318 sampled were thus linearly interpolated at the time of the DHP measurements from which  $fIPAR_{WS}(t)$   
319 were computed.

320 Results (Figure 8) show that the constraint in the early morning between the leaf rolling score  
321 ( $Score(t_0) = 1.0$ ) and the  $\Delta fIPAR_{WS}$  values is well verified later in the day when no leaf rolling is  
322 experienced such as for the irrigated modality in 2016. The  $\Delta fIPAR_{WS}$  values are strongly and linearly  
323 related to the  $Score$  (Figure 8). A simple linear model verifying the early morning constraint  
324 ( $Score(t_0) = 1.0$ ;  $\Delta fIPAR_{WS}(t_0) = 0.0$ ) was fitted to the available data:

$$325 \quad (Score(t) - 1) = Slope \cdot \Delta fIPAR_{WS}(t) \quad \text{Equation 3}$$

326 It provides very good performances (Table 2) for the 2 years under water stress conditions. For the  
327 irrigated modality in 2016, the points are concentrated close to the unrolled leaf situation with  
328  $Score(t_0) = 1.0$  and  $\Delta fIPAR_{WS}(t_0) = 0.0$ . However, a small difference is observed between the two  
329 years, 2016 showing lower sensitivity of the canopy structure ( $\Delta fIPAR_{WS}$ ) to the leaf level rolling  
330 ( $Score$ ). This difference may partly be attributed to the slightly smaller leaf development of the canopy  
331 in 2016 as observed in Figure 6: when the canopy is less developed, limited absolute effects on canopy  
332 structure are expected. This effect may be accounted for by normalizing the values of  $\Delta fIPAR_{WS}$  by the  
333 average  $\Delta fIPAR_{WS}$  value observed for the maximum leaf rolling state,  $\Delta fIPAR_{WS}^{max(year)}$ , leading to  
334 propose the  $CLIR$  index (Canopy Level Index for Rolling):

$$335 \quad CLIR = \frac{\Delta fIPAR_{WS}(t)}{\Delta fIPAR_{WS}^{max(year)}} \quad \text{Equation 4}$$

336 The canopy level leaf rolling index,  $CLIR$ , is therefore related to the leaf level rolling score according to:

$$337 \quad (Score(t) - 1) = 8 \cdot CLIR(t) \quad \text{Equation 5}$$

338 Where  $\Delta fIPAR_{WS}^{max(2015)} = 0.190$  and  $\Delta fIPAR_{WS}^{max(2016)} = 0.160$ . Results (Table 2) show a slight  
339 improvement in the performances of the regression due to the enhanced consistency between years.

### 340 **3.4 Comparison between genotypes**

341 The comparison of the reaction to water stress between genotypes was completed by considering either  
342 the magnitude of the diurnal variation of leaf rolling or the way it develops, i.e. the dynamics.

#### 343 **3.4.1 Magnitude of leaf rolling**

344 The magnitude of the leaf rolling score was evaluated as  $\max(Score - 1)$  over the day for each  
345 microplot. The well-watered modality in 2016 (2016 WW) have a minimal magnitude consistently with  
346 the no leaf rolling experienced. Under water stress conditions, genotypes show important differences

347 (Figure 9 left). About half the microplots have a maximum rolling score lower or equal to 6, with few of  
348 them showing only small leaf rolling at the end of the afternoon when it is expected to be maximum.  
349 Year 2016 appears to have generally less leaf rolling in agreement with the previous observations (Figure  
350 4). The 8 genotypes common in 2015 and 2016 show relatively low level of consistency of the ranking  
351 between the 2 years (Figure 10 left). Conversely, a high degree of consistency is observed when using the  
352 CLIR index to quantify leaf rolling at the canopy level (Figure 10 right). The better performances for CLIR  
353 as compared to the leaf Score are mainly explained by the more progressive values of *CLIR* as observed  
354 on the distribution of values (Figure 9 right) as well as the more objective values provided by the DHP  
355 measurements as compared to the visual scoring. Nevertheless the two quantities are highly correlated  
356 (Table 3) with  $R^2=0.771$  and  $RMSE=1.15$ .

### 357 3.4.2 Diurnal dynamics of the leaf rolling

358 The effect of leaf rolling at the canopy level was investigated here by transforming the  $fIPAR_{WS}$  values  
359 into leaf rolling score according to equation 4. The diurnal dynamics of the leaf rolling visual score and  
360 the estimates from the DHP measurements are generally very consistent (Figure 11), confirming the  
361 previous results (Table 1 and Figure 8). The well-watered modality shows no leaf rolling at all along with  
362 no significant changes in the canopy structure during the day (Figure 11).

363 Although the genotypic variability of the magnitude of rolling at the leaf and canopy levels appears as  
364 one of the main features observed, other traits of the dynamics were further investigated. For this  
365 purpose, both the visual scores at the leaf level and the canopy level *CLIR* values derived from the DHP  
366 measurements were normalized by their minimum and maximum values observed in the 8:00 to 17:00  
367 time interval over each plot:

$$368 \quad Rolling = \frac{Score}{\max(Score) - \min(Score)} \quad \text{Equation 6}$$

$$369 \quad Rolling = \frac{CLIR}{\max(CLIR) - \min(CLIR)} \quad \text{Equation 7}$$

370 Emphasis was then put on the period of rapid rolling variation corresponding to the 9:00 to 13:00 time  
371 interval (Figure 11). The very good consistency between both types of measurements is further  
372 demonstrated by Figure 12. The development of leaf and canopy level rolling appears very linear with  
373 time. Two traits characterizing the dynamics were therefore computed for each plot using a robust linear  
374 fit to the available data: the slope ( $\alpha$ ) and the time at half maximum ( $t_{max/2}$ ).

375 
$$\text{Rolling} = 0.5 + \alpha(t - t_{max/2}) \quad \text{Equation 8}$$

376 Results show that  $t_{max/2}$  varies strongly between genotypes and years:  $11:15 < t_{max/2} < 12:45$   
377 (Figure 13 left). Earlier  $t_{max/2}$  is observed in 2016 as compared to 2015. Consistency between the 8  
378 common genotypes across the 2 years is relatively poor ( $\rho=0.33$ ,  $R^2=0.49$ ). The slope ( $\alpha$ ) shows also a  
379 large variability between genotypes and years:  $0.1 < \alpha < 0.3$  (Figure 13 right and Figure 14 right). The  
380 consistency between the 8 common genotypes among the 2 years for  $\alpha$  values is even poorer ( $\rho=0.29$ ,  
381  $R^2=0.21$ ) than that of  $t_{max/2}$ . Conversely to  $t_{max/2}$ , larger values of  $\alpha$  are generally observed in 2016  
382 (Figure 13 right and Figure 14 left). A negative correlation links  $t_{max/2}$  and  $\alpha$  ( $R^2=0.42$ ): since rolling  
383 starts to develop approximately at the same time (between 8:15 to 9:30, Figure 11 and Figure 12), the  
384 value of the half magnitude will be reached for earlier  $t_{max/2}$  values. However, the values are much  
385 similar for the 2 years when computing for each plot the absolute value of the rolling development rate:  
386 while the leaf score ( $\alpha(\max(\text{Score}) - \min(\text{Score}))$ ) shows still some year effect (Figure 14 center), the  
387 canopy level ( $\alpha(\max(\text{CLIR}) - \min(\text{CLIR}))$ ) shows marginal effects, particularly for the 8 common  
388 genotypes (Figure 14 right).

389

## 390 **4 Conclusion**

391 This study focuses on leaf rolling in maize crops subjected to water stress. During the 2 year experiments  
392 conducted around the female flowering stage, the soil moisture was below the hardly extractible water  
393 threshold, and high VPD values were observed during the day. As a consequence, leaf rolling was starting  
394 to be significant after 9:00 UT when VPD $\approx$ 1.5 kPa, reaching its maximum value around 15:30 UT close to  
395 the maximum VPD value of the day. Differences between genotypes and years were mostly related to  
396 the maximum of leaf rolling score observed. Year 2016 was characterized by lower score values in  
397 relation with the smaller water stress level experienced (more water in the soil, lower VPD values) as  
398 compared to year 2015. However, the 8 genotypes sampled on both years show a relatively good  
399 consistency between both years in the ranking of the maximum score values observed ( $\rho=0.41$ ) which  
400 would indicate some useful degree of heritability. Further works conducted over the ensemble of  
401 microplots of the experiments should be undertaken to confirm the level of heritability of the leaf rolling.  
402 However, scoring the leaf rolling from visual inspection of hundreds of microplots within a limited time  
403 period is not easily feasible because of the highly dynamic character of leaf rolling. Alternative high-

404 throughput phenotyping methods are thus highly desired. This is the reason why this study investigated  
405 concurrently the impact of leaf rolling on canopy structure that may be accessed with high-throughput  
406 using remote sensing techniques. However, before developing an operational system, we concentrated  
407 on the comparison between leaf level and canopy level rolling features.

408 Canopy structure changes due to leaf rolling were documented using DHP measurements. More detailed  
409 inspection of the relationship between the changes in the gap fractions derived from DHPs and the leaf  
410 level visual scoring of rolling shows strong correlations for all the directions considered. For this reason,  
411 the white sky FIPAR,  $FIPAR_{ws}$ , was proposed as a good proxy of the canopy structure changes induced  
412 by the leaf level rolling: it retains the main changes while smoothing out uncertainties associated with  
413 limited directional sampling of the gap fraction. To compensate for the possible differences of  $FIPAR_{ws}$   
414 between experimental conditions and genotypes in the early morning when no leaf rolling is expected,  
415 the early morning  $FIPAR_{ws}$  values were subtracted from the  $FIPAR_{ws}$  values measured during the day  
416 to get  $\Delta FIPAR_{ws}$ . However, the values of  $\Delta FIPAR_{ws}$  observed around 15:00 UTC when the maximum  
417 leaf rolling is expected may differ from year to year depending on the experimental conditions. This  
418 effect was further accounted for by normalizing  $\Delta FIPAR_{ws}$  by the mean of maximum values of  
419  $\Delta FIPAR_{ws}$  observed during the day across all the micro-plots available. This resulted in the Canopy Level  
420 Index for Rolling (*CLIR*). The coordination between the rolling of the leaf section and the opening of the  
421 canopy as quantified by *CLIR* appears very strong and relatively stable across genotypes and the 2 years  
422 investigated. Further, a higher degree of consistency ( $\rho=0.62$ ) was observed between the ranking of the  
423 maximum *CLIR* values of 2015 and 2016 years among the 8 genotypes common for the 2 years.

424 Apart from the magnitude, other features associated to the dynamics were investigated. The time when  
425 half magnitude is reached ( $t_{max/2}$ ) is not easy to estimate and shows significant variability between  
426 genotypes and years. Year 2016 shows generally earlier  $t_{max/2}$  although the water stress was less severe  
427 as compared to that experienced in 2015. Consistency of the ranking between the 8 common genotypes  
428 is poor ( $\rho=0.33$ ) for  $t_{max/2}$ , making it a trait difficult to use for breeding. The rate of development of leaf  
429 rolling at the leaf (score) and canopy levels (*CLIR*) shows little differences between years, especially for  
430 *CLIR* that changes with similar paces for the 2 years. Although the genotypic variability is significant, the  
431 consistency of the ranking between the common genotypes for the 2 years is poor both for the rate of  
432 change of the score ( $\rho=0.21$ ) and for *CLIR* ( $\rho=0.10$ ). As a result, the magnitude of the rolling from the  
433 early morning to the maximum rolling value appears to be the main trait that was related to some  
434 genotype features. This should be further investigated on a larger scale to quantify the corresponding

435 heritability and possible association with markers in the genome. A high-throughput phenotyping  
436 method should therefore be developed to estimate leaf rolling from canopy level measurements. The  
437 use of UAVs equipped with a multispectral camera would provide a very efficient way to cover a large  
438 experiment within a limited time period. A minimum of two flights will be necessary: one in the early  
439 morning to document the unrolled state, and one in the mid-afternoon to quantify the canopy structure  
440 when leaf rolling is at its maximum. The measurements should be completed in periods when water  
441 stress is already well expressed, and in a day with a high VPD values to maximize plant reactions. The  
442 relation between the data captured by the multispectral camera and the leaf rolling state could be  
443 achieved simply using empirical transfer functions. A representative sample of ground measurements  
444 should therefore be collected concurrently to the flights to calibrate the transfer functions. The  
445 proposed  $FIPAR_{ws}$  variable as derived from DHPs according to the methodology presented in this study  
446 would provide an efficient solution.

447 Although leaf rolling can be quantified both at the leaf and the canopy levels as demonstrated in this  
448 study, differences between genotypes in terms of physiological response to water stress is still a pending  
449 question. The differences between genotypes may relate to variations in soil moisture due to differences  
450 in water consumption or rooting system development and efficiency. It may also relate to the regulation  
451 of stomatal closure, as well as variation in the relation between rolling at the leaf level and leaf water  
452 potential induced by morphological leaf differences. Further, while this study shows that the leaf level  
453 rolling induces canopy level changes relatively stable across genotypes, possible residual genotypic  
454 effects may complicate the interpretation. Detailed studies are therefore required to better understand  
455 the mechanisms that sustain leaf rolling under water stress conditions.

## 456 **5 Acknowledgement**

457 This study was supported by “Programme d’investissement d’Avenir” PHENOME (ANR-11-INBS-012). The  
458 experiment was mostly conducted by BIOGEMMA.

## 459 **6 References**

460 Abd Allah, A.A., 2009. Genetic studies on leaf rolling and some root traits under drought conditions in  
461 rice (*Oryza sativa* L.). African Journal of Biotechnology 8, 6241-6248.



- 462 Adebayo, M.A., Menkir, A., 2014. Assessment of hybrids of drought tolerant maize (*Zea mays* L.) inbred  
463 lines for grain yield and other traits under stress managed conditions. *Nigerian Journal of Genetics* 28,  
464 19-23.
- 465 Bolanos, J., Edmeades, G., 1996. The importance of the anthesis-silking interval in breeding for drought  
466 tolerance in tropical maize. *Field Crops Research* 48, 65-80.
- 467 Clarke, J.M., 1986. Effect of leaf rolling on leaf water loss in *Trilicam spp.* Canada. *Journal of Plant Science*  
468 66, 885-891.
- 469 Demarez, V., Duthoit, S., Weiss, M., Baret, F., Dedieu, G., 2008. Estimation of leaf area index (LAI) of  
470 wheat, maize and sunflower crops using digital hemispherical photographs. *Agricultural and Forest*  
471 *Meteorology* 148, 644-655.
- 472 Divi, U.K., Rahman, T., Krishna, P., 2010. Brassinosteroid-mediated stress tolerance in *Arabidopsis* shows  
473 interactions with abscisic acid, ethylene and salicylic acid pathways. *Bmc Plant Biology* 10.
- 474 Driscoll, S., Prins, A., Olmos, E., Kunert, K., Foyer, C., 2006. Specification of adaxial and abaxial stomata,  
475 epidermal structure and photosynthesis to CO<sub>2</sub> enrichment in maize leaves. *Journal of experimental*  
476 *botany* 57, 381-390.
- 477 Duncan, W.G., 1971. Leaf angles, leaf area and canopy photosynthesis. *Crop Science* 11, 482-485.
- 478 Farhangfar, S., Bannayan, M., Khazaei, H.R., Baygi, M.M., 2015. Vulnerability assessment of wheat and  
479 maize production affected by drought and climate change. *International Journal of Disaster Risk*  
480 *Reduction* 13, 37-51.
- 481 Hay, J.O., Moulia, B., Lane, B., Freeling, M., Silk, W.K., 2000. Biomechanical analysis of the Rolled (RLD)  
482 leaf phenotype of maize. *American Journal of Botany* 87, 625-633.
- 483 Jonckheere, I., Fleck, S., Nackaerts, K., Muys, B., Coppin, P., Weiss, M., Baret, F., 2004. Review of  
484 methods for in situ leaf area index determination: Part I. Theories, sensors and hemispherical  
485 photography. *Agricultural and Forest Meteorology* 121, 19-35.
- 486 Kadioglu, A., Terzi, R., 2007. A dehydration avoidance mechanism: Leaf rolling. *Botanical Review* 73, 290-  
487 302.
- 488 Kadioglu, A., Terzi, R., Saruhan, N., Saglam, A., 2012. Current advances in the investigation of leaf rolling  
489 caused by biotic and abiotic stress factors. *Plant Science* 182, 42-48.
- 490 Krishna, P., 2003. Brassinosteroid-mediated stress responses. *Journal of Plant Growth Regulation* 22,  
491 289-297.

- 492 Lopez-Lozano, R., Baret, F., Chelle, M., Rochdi, N., Espana, M., 2007. Sensitivity of gap fraction to maize  
493 architectural characteristics based on 4D model simulations. *Agricultural and Forest Meteorology* 143,  
494 217-.
- 495 Monteith, J., Unsworth, M., 2007. *Principles of environmental physics* Third edition. Academic Press,  
496 London (UK).
- 497 Moulia, B., 1994. Biomechanics of leaf rolling. *Biomimetics* 2, 267-281.
- 498 Moulia, B., 2000. Leaves as shell structures: double curvature, auto-stresses, and minimal mechanical  
499 energy constraints on leaf rolling in grasses. *Journal of Plant Growth Regulation* 19, 19-30.
- 500 Nar, H., Saglam, A., Terzi, R., Varkonyi, Z., Kadioglu, A., 2009. Leaf rolling and photosystem II efficiency in  
501 *Ctenanthe setosa* exposed to drought stress. *Photosynthetica* 47, 429-436.
- 502 O'Toole, J.C., Cruz, R.T., Singh, T.N., 1979. Leaf rolling and transpiration. *Plant Science Letters* 16, 111-  
503 114.
- 504 Peleg, Z., Fahima, T., Krugman, T., Abbo, S., Yakir, D.e.a., 2009. Genomic dissection of drought resistance  
505 in durum wheat × wild emmer wheat recombinant inbred line population. *Plant Cell and Environment*  
506 32, 758-779.
- 507 Premachandra, G.S., Saneoka, H., Fujita, K., Ogata, S., 1993. Water stress and potassium fertilization in  
508 field grown maize (*Zea mays* L.): effects of leaf water relations and leaf rolling. *J Agron Crop Sci* 170, 195-  
509 201.
- 510 Price, A.H., Cairns, J.E., Horton, P., Jones, H.G., Griffiths, H., 2002. Linking drought-resistance mechanisms  
511 to drought avoidance in upland rice using a QTL approach: progress and new opportunities to integrate  
512 stomatal and mesophyll responses. *Journal of experimental botany* 53, 989-1004.
- 513 Saglam, A., Kadioglu, A., Demiralay, M., Terzi, R., 2014. Leaf rolling reduces photosynthetic loss in maize  
514 under severe drought. *Acta Botanica Croatica* 73, 315-332.
- 515 Saglam, A., Terzi, R., Nar, H., Saruhan, N., Ayaz, F.A., Kadioglu, A., 2010. Inorganic and organic solutes in  
516 apoplastic and symplastic spaces contribute to osmotic adjustment during leaf rolling in *ctenanthe*  
517 *setosa*. *Acta Biologica Cracoviensia Series Botanica* 52, 37-44.
- 518 Sankaran, S., Khot, L.R., Espinoza, C.Z., Jarolmasjed, S., Sathuvalli, V.R., Vandemark, G.J., Miklas, P.N.,  
519 Carter, A.H., Pumphrey, M.O., Knowles, N.R., 2015. Low-altitude, high-resolution aerial imaging systems  
520 for row and field crop phenotyping: A review. *European Journal of Agronomy* 70, 112-123.
- 521 Sarieva, G.E., Kenzhebaeva, S.S., Lichtenthaler, H.K., 2010. Adaptation potential of photosynthesis in  
522 wheat cultivars with a capability of leaf rolling under high temperature conditions. *Russian Journal of*  
523 *Plant Physiology* 57, 28-36.

524 Saruhan, N., Saglam, A., Kadioglu, A., 2012. Salicylic acid pretreatment induces drought tolerance and  
525 delays leaf rolling by inducing antioxidant systems in maize genotypes. *Acta Physiologiae Plantarum* 34,  
526 97-106.

527 Sirault, X.R.R., Condon, A.G., Wood, J.T., Farquhar, G.D., Rebetzke, G.J., 2015. "Rolled-upness":  
528 phenotyping leaf rolling in cereals using computer vision and functional data analysis approaches. *Plant*  
529 *Methods* 11.

530 Smith, W.K., Vogelmann, T.C., Bell, D.T., DeLucia, E.H., Shepherd, K.A. , 1997. Leaf form and  
531 photosynthesis. *Bioscience* 47, 785-793.

532 Soares, A.S., Driscoll, S.P., Olmos, E., Harbinson, J., Arrabaça, M.C., Foyer, C.H., 2008. Adaxial/abaxial  
533 specification in the regulation of photosynthesis and stomatal opening with respect to light orientation  
534 and growth with CO<sub>2</sub> enrichment in the C<sub>4</sub> species *Paspalum dilatatum*. *New Phytologist* 177, 186-198.

535 Subashri, M., Robin, S., Vinod,K.K., Rajeswari,S., Mohanasundaram,K., Raveendran,T.S. , 2009. Trait  
536 identification and QTL validation for reproductive stage drought resistance in rice using selective  
537 genotyping of near flowering RILs. *Euphytica* 166, 291-305.

538 Takahashi, T., Kakehi, J.-I., 2010. Polyamines: ubiquitous polycations with unique roles in growth and  
539 stress responses. *Annals of Botany* 105, 1-6.

540 Talaat, N.B., Shawky, B.T., 2012. 24-Epibrassinolide ameliorates the saline stress and improves the  
541 productivity of wheat (*Triticum aestivum* L.). *Environmental and Experimental Botany* 82, 80-88.

542 Tatar, O., Brueck, H., Gevrek, M.N., Asch, F., 2010. Physiological responses of two Turkish rice (*Oryza*  
543 *sativa* L.) varieties to salinity. *Turkish Journal of Agriculture and Forestry* 34, 451-459.

544 Weiss, M., Baret, F., Smith, G.J., Jonckheere, I., Coppin, P., 2004a. Review of methods for in situ leaf area  
545 index (LAI) determination: Part II. Estimation of LAI, errors and sampling. *Agricultural and Forest*  
546 *Meteorology* 121, 37-53.

547 Weiss, M., Baret, F., Smith , G.J., Jonckheered, I., Coppin, P., 2004b. Review of methods for in situ leaf  
548 area index determination, part II: Estimation of LAI, errors and sampling. *Agricultural and Forest*  
549 *Meteorology* 121, 37-53.

550

551

552

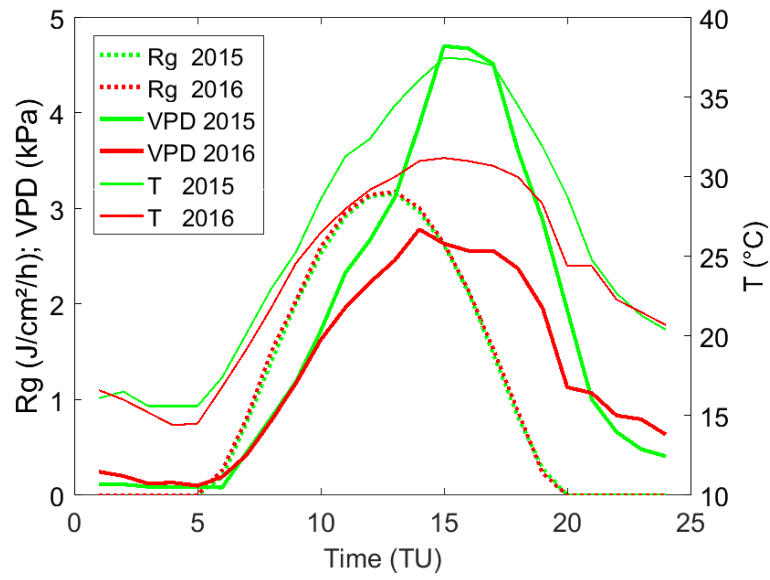

553

554 Figure 1. diurnal variation of global radiation (Rg), temperature (T) and VPD observed the 5<sup>th</sup> of August 2015 and the 3<sup>rd</sup> of  
555 August 2016 in Nérac experiment.

556

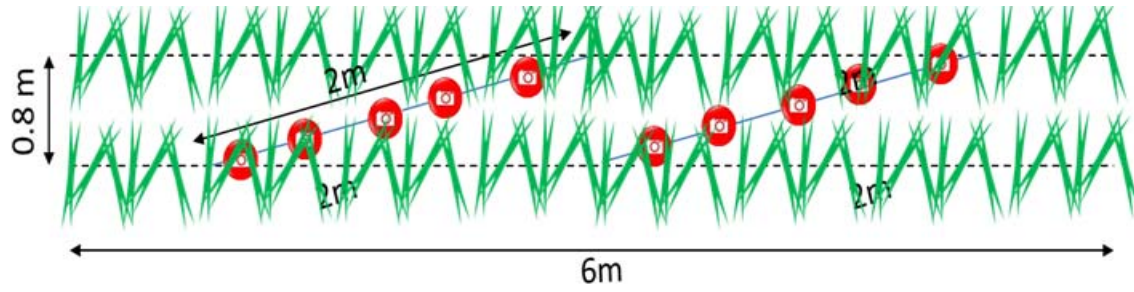

557

558 **Figure 2 : Location of DHP measurements over the 2 rows of a microplot.**

559

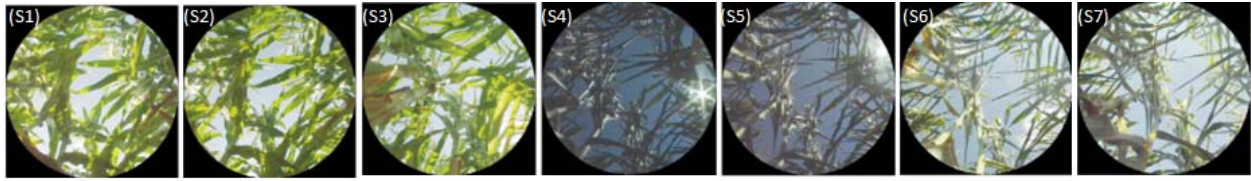

560

561 Figure 3 : DHP images taken at seven different time (S1: morning, S7: late afternoon) at the same location of a microplot.  
562 Images show artifacts for S4 and S5 due to direct sun light. It shows clearly the changes of canopy structure from the morning  
563 to afternoon due to leaf rolling

564

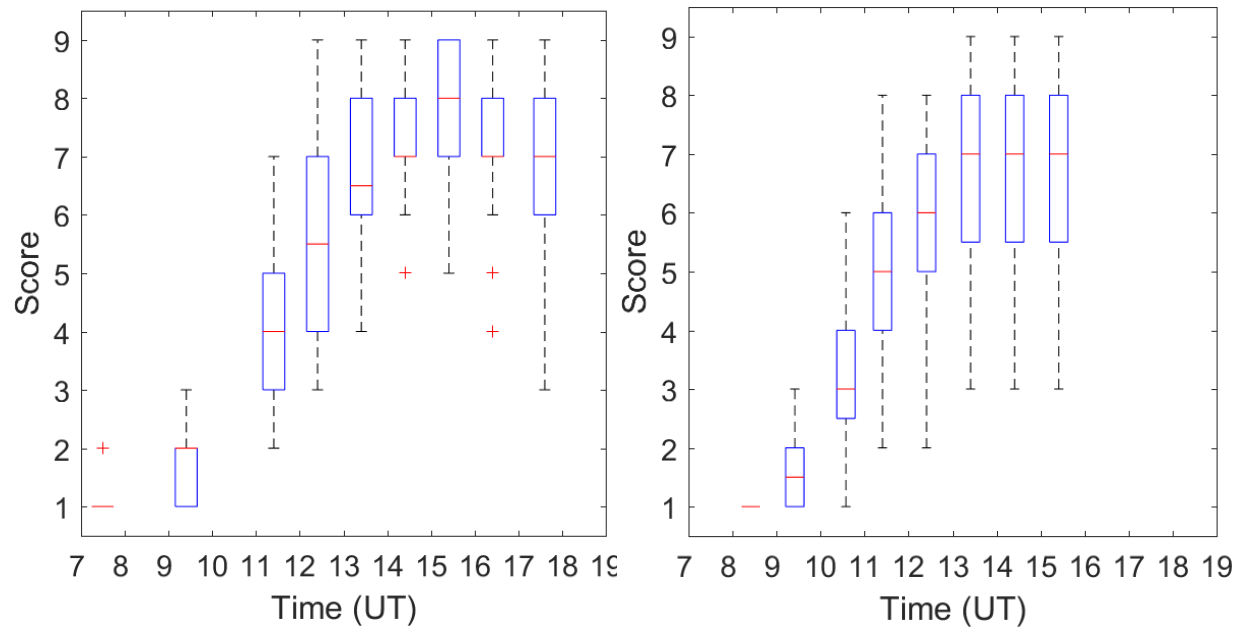

565  
566 **Figure 4 : Diurnal pattern of leaf rolling scores for Water stress modality. In 2015 (left) 30 genotypes; in 2016 (right) 16**  
567 **genotypes. Box plot representation where the red line is the median, the edges of the box are the 25th and 75th percentiles,**  
568 **the whiskers extend to the most extreme data points the algorithm considers to be not outliers, and the outliers are plotted**  
569 **individually as red '+'.**

570

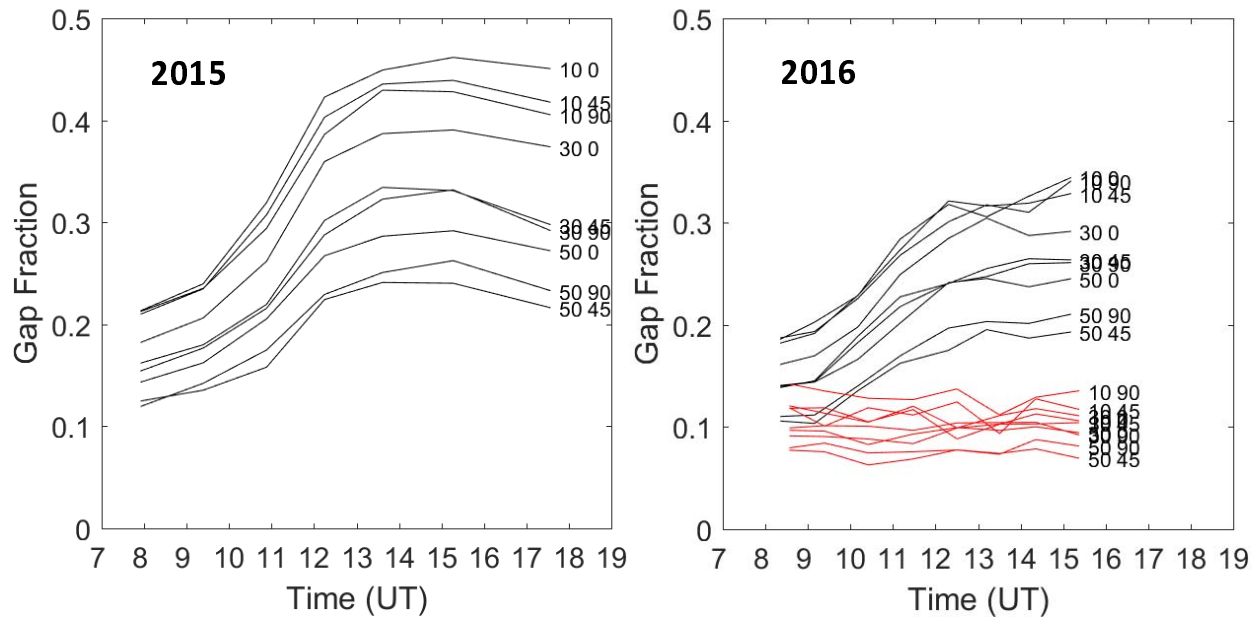

571

572 **Figure 5 : Diurnal evolution of the gap fraction values measured for 9 solid angles indicated by the numbers on the left: the**  
573 **first number is the zenith, the second one is the azimuth. Each curve is the average of the 30 genotypes for 2015, 16 water-**  
574 **stressed genotypes for 2016, and 4 irrigated genotypes for 2016.**

575



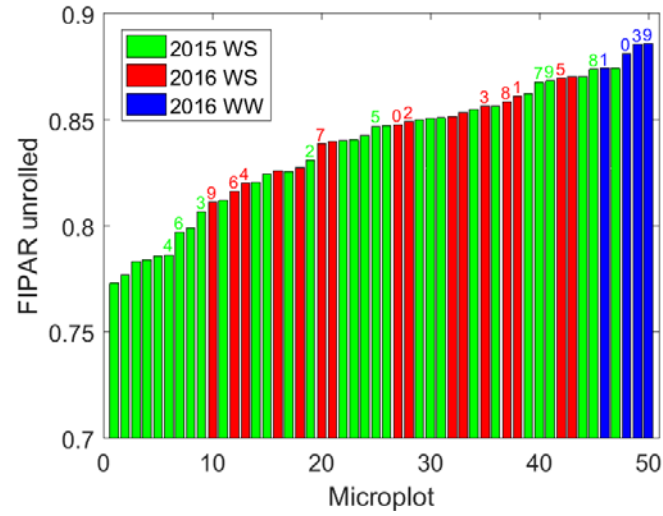

576

577 Figure 6. Distribution of the  $fIPAR^{WS}$  values observed in the early morning (unrolled state) for all the 50 genotypes  
578 investigated. The values are sorted in ascending order. The colors correspond to the years and modalities. The genotypes  
579 common between years and modalities are indicated above each bar.

580

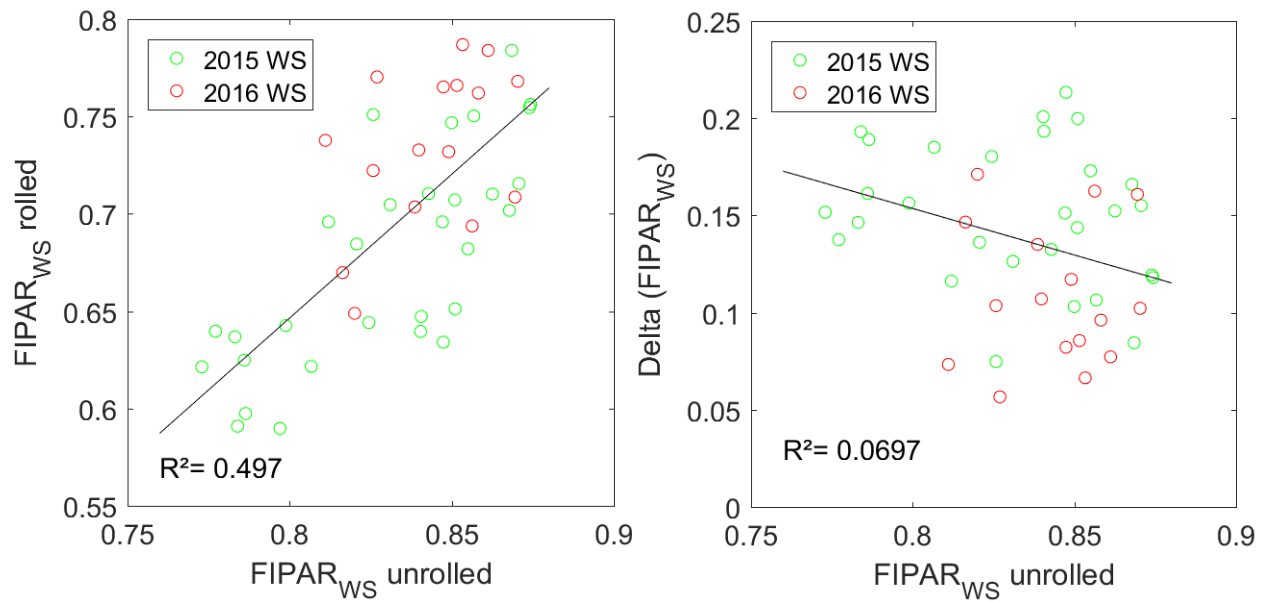

581

582 Figure 7. On the left panel, relationship between the unrolled state  $fIPAR_{WS}$  observed in the early morning ( $FIPAR_{WS}$   
583 unrolled) and the  $fIPAR_{WS}$  values corresponding to the state with maximum leaf rolling observed in the late afternoon  
584 ( $FIPAR_{WS}$  rolled). On the right panel, relationship between the unrolled state  $fIPAR_{WS}$  ( $FIPAR_{WS}$  unrolled) and the difference  
585 between  $fIPAR^{WS}$  values observed between early morning and late afternoon (Delta ( $FIPAR_{WS}$ )). Data corresponding to the  
586 water stress modality (WS, 46 points) in 2015 (green) and 2016 (red). The solid line represents the linear best fit.

587

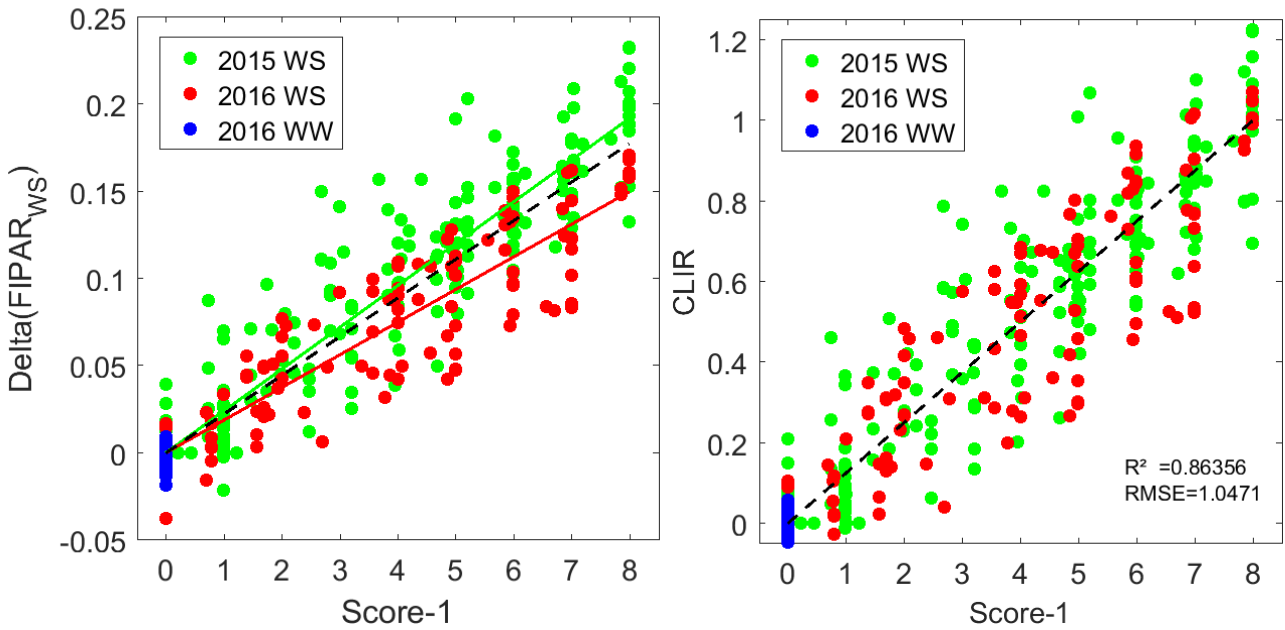

588

589 Figure 8. On the left, relationship between  $\Delta fIPAR_{WS}$  and the leaf rolling visual score (Score-1). The solid lines correspond to  
590 the best fit line verifying the constraint  $\Delta fIPAR_{WS} = 0$  when  $Score = 1$  (Equation 3) for the 2015 (green) and 2016 (red)  
591 WS modalities. The black dash line corresponds to the best fit over the 370 available points (including the WW modality in  
592 2016). On the right, relationship between CLIR and the leaf rolling visual score (Score-1). The solid black line corresponds to  
593 Equation 5.

594

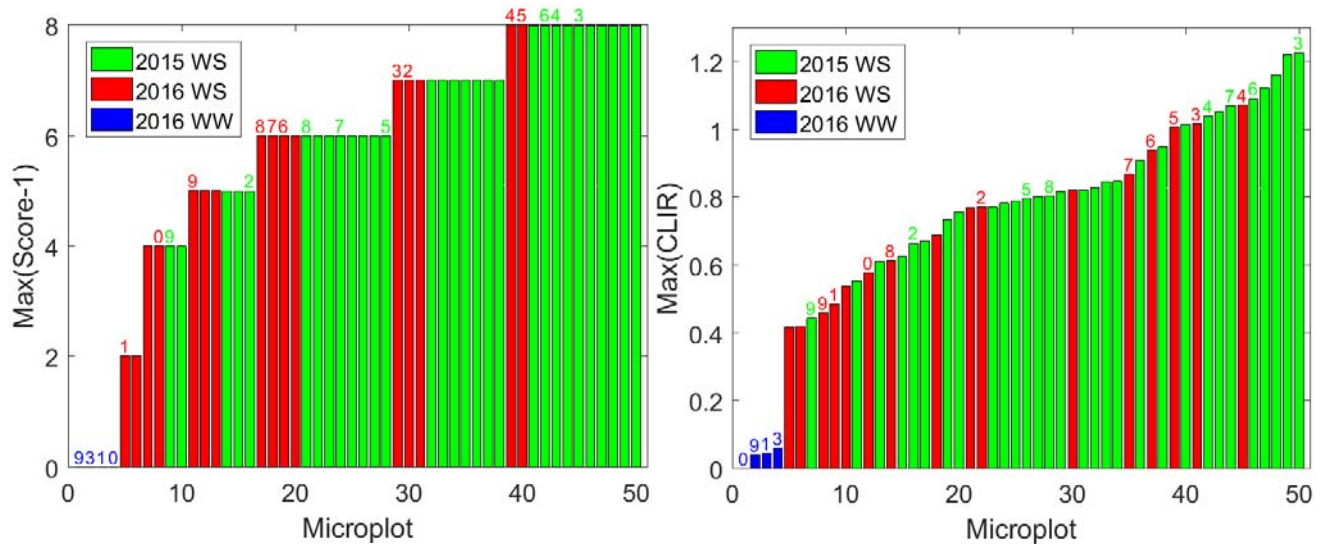

595

596 Figure 9. On the left, distribution of the maximum value of the leaf rolling visual score(Max(Score-1)) observed over each  
 597 microplot during the day. On the right, distribution of the maximum value of *CLIR* observed over each microplot during the  
 598 day. The values are sorted in ascending order. The colors correspond to the years and modalities for the 50 microplots. The  
 599 genotypes common between years and modalities are indicated above each bar.

600

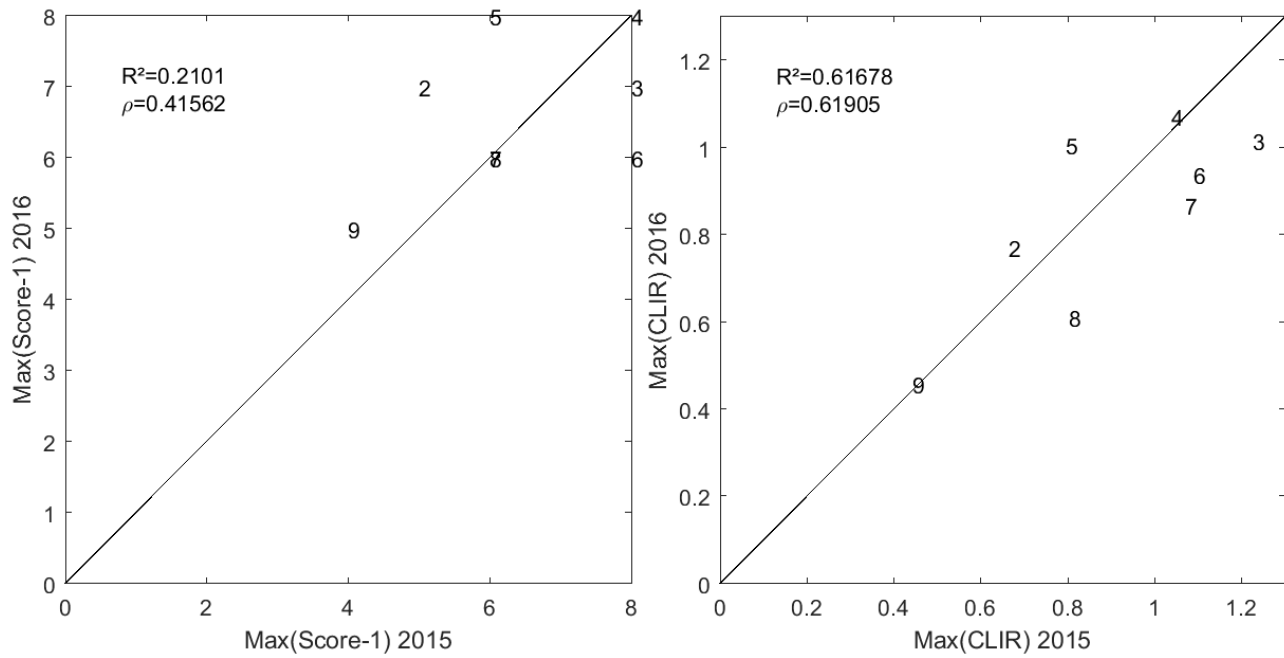

601

602 Figure 10. On the left, comparison between the maximum value of the normalized score (Score-1) observed in 2015 (x axis)  
603 and 2016 (y axis). On the right, comparison between the maximum value of CLIR observed in 2015 (x axis) and 2016 (y axis).  
604 The numbers correspond to the genotype identifier. The solid line is the 1:1 line. The Pearson ( $R^2$ ) and Spearman ( $\rho^2$ )  
605 coefficients are provided.

606

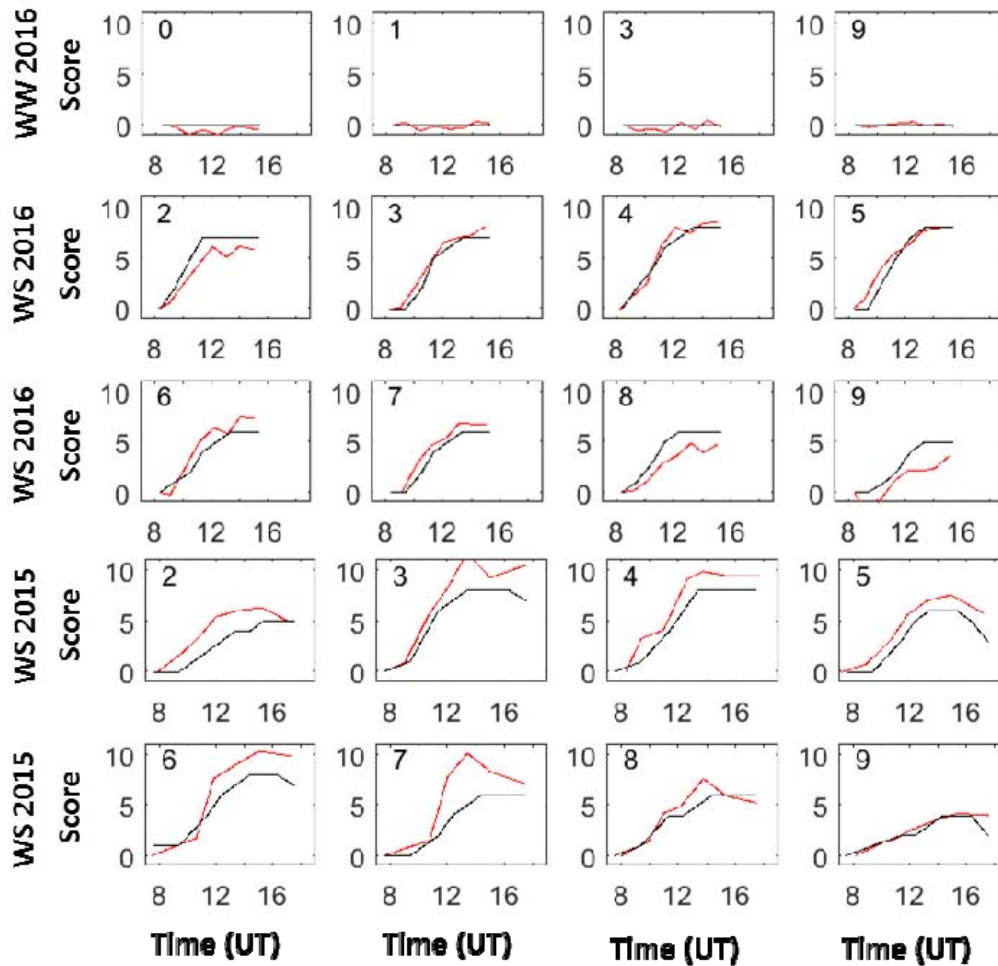

607

608 Figure 11. Diurnal dynamics of the leaf rolling visual scores evaluated at the leaf level (black line), and the score estimated  
609 from equation 5 (red line) from canopy level DHP measurements. Top, the 2 center and bottom plots correspond respectively  
610 to 2016 WW (4 genotypes), 2016 WS (8 genotypes) and 2015 WS (the same 8 genotypes). Genotype identifier is given in  
611 each subplot.

612

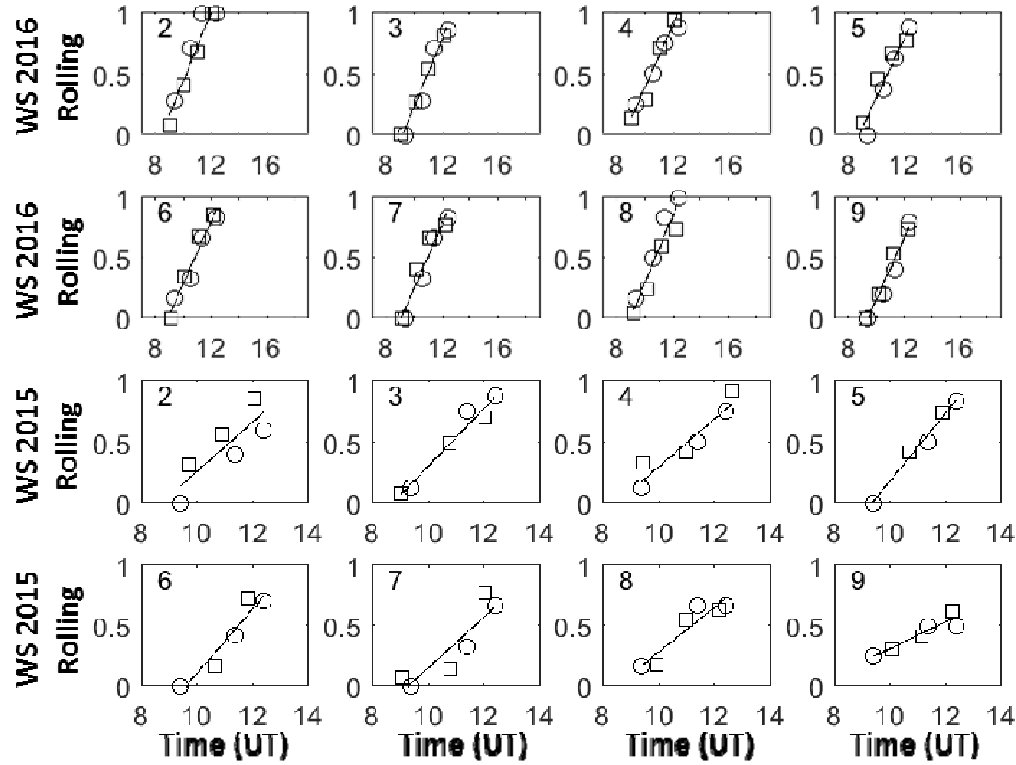

613

614 Figure 12. dynamics of the rolling evaluated at the leaf level (○), and the canopy level (□) using Equation in the 9:00 to 13:00  
615 time interval. The solid line corresponds to the best linear robust fit. The 2 top and bottom plots correspond respectively to  
616 2016 WS (8 genotypes) and 2015 WS (the same 8 genotypes). Genotype identifier is given in each subplot.

617

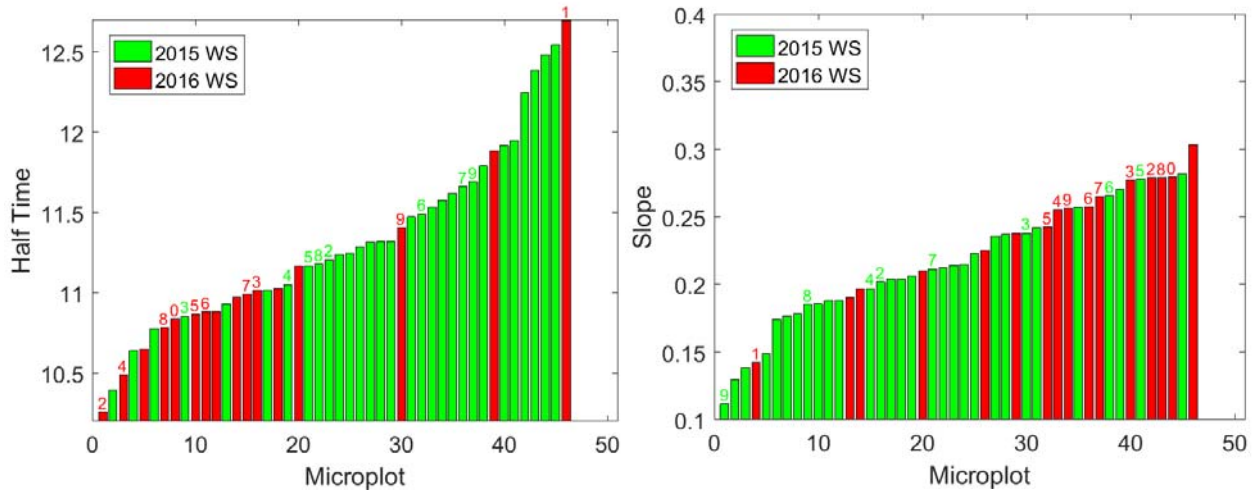

618

619 Figure 13. Distribution of the time ( $t_{max/2}$  in hour) when half the maximum rolling is observed (left) and the slope  
620 corresponding to the rate of change of the rolling from minimum to maximum ( $\alpha$  in hour<sup>-1</sup>). The colors correspond to the  
621 years and modalities for the 46 microplots (the WW 2016 plots are obviously not represented here). The genotypes common  
622 between years and modalities are indicated above each bar.

623



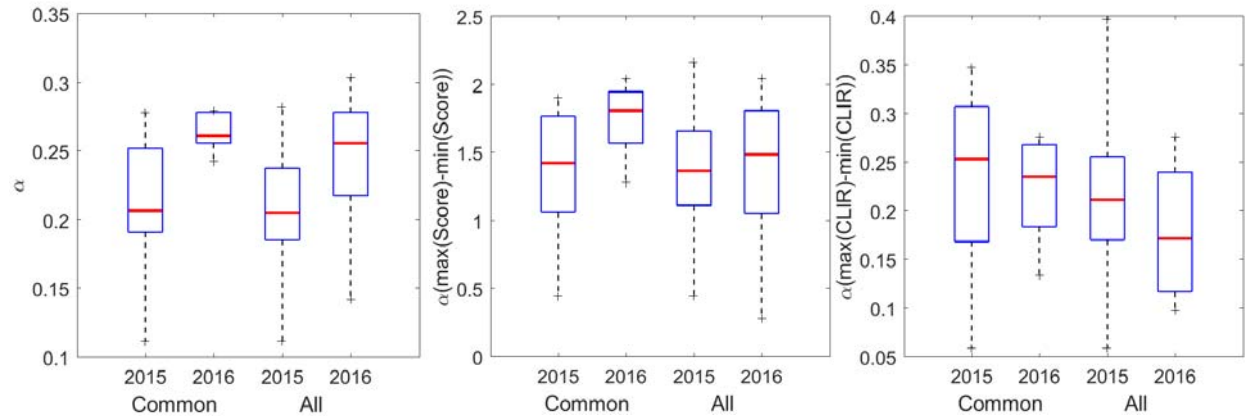

624

625 Figure 14. Distribution of the slope values for the 8 common genotypes in 2015 or 2016 and for all the genotypes considered  
626 in 2015 (30) and 2016 (16) for the WS modality. Three slopes are displayed: on the left the slope  $\alpha$  computed on the  
627 normalized Scores and CLIR data; in the center, the slopes in absolute values of Scores ( $\alpha(\max(\text{Score}) - \min(\text{Score}))$ ); on  
628 the right, the slopes in absolute values of CLIR ( $\alpha(\max(\text{CLIR}) - \min(\text{CLIR}))$ ).

629

630 **Table 1. Distribution of the 38 genotypes used in 2015 and 2016 for the WS and WD modalities.**

| <b>Genotypes #</b> | <b>WS 2015</b> | <b>WS 2016</b> | <b>WW 2016</b> | <b>Number</b> |
|--------------------|----------------|----------------|----------------|---------------|
| 16-37              | X              |                |                | 22            |
| 10-15              |                | X              |                | 6             |
| 2, 4, 5, 6, 7, 8   | X              | X              |                | 6             |
| 0, 1               |                | X              | X              | 2             |
| 3, 9               | X              | X              | X              | 2             |
| <b>Total</b>       | <b>30</b>      | <b>16</b>      | <b>4</b>       | <b>50</b>     |

631

632

633 **Table 2. Characteristics of the models (Equation 3 or Equation 4) used to relate the leaf rolling visual score to the canopy**  
 634 ***fIPAR<sub>WS</sub>* level values. RMSE is expressed in Score units. <sup>(1)</sup> It includes also the 2016 WW plots.**

| Model                                               | Sample             | Nb. points | Slope | R <sup>2</sup> | RMSE |
|-----------------------------------------------------|--------------------|------------|-------|----------------|------|
| $(Score(t) - 1) = Slope \cdot \Delta fIPAR_{WS}(t)$ | 2015 WS            | 210        | 41.64 | 0.857          | 1.05 |
|                                                     | 2016 WS            | 128        | 53.32 | 0.823          | 1.17 |
|                                                     | All <sup>(1)</sup> | 370        | 45.04 | 0.845          | 1.14 |
| $(Score(t) - 1) = 8 \cdot CLIR(t)$                  | All <sup>(1)</sup> | 370        | 8     | 0.864          | 1.05 |
| $(\max(Score - 1)) = 8 \cdot \max(CLIR)$            | All <sup>(1)</sup> | 50         | 8     | 0.771          | 1.15 |

635
